# Supplementary material for: Conservation and Role of Electrostatics in Thymidylate Synthase
Source: PubMed Central journal article supplement (PMC4661567; doi:10.1038/srep17356), 2015-11-27
Supplement: srep17356-s1.pdf [file srep17356-s1.pdf]

## Supplementary Information

### Conservation and Role of Electrostatics in Thymidylate Synthase

Divita Garg<sup>a,b,c,1</sup>, Stephane Skouloubris<sup>d,e</sup>, Julien Briffotiaux<sup>d</sup>, Hannu Myllykallio<sup>d</sup>, Rebecca C. Wade<sup>a,f,g</sup>

<sup>a</sup>Molecular and Cellular Modeling Group, Heidelberg Institute for Theoretical Studies (HITS), Schloss-Wolfsbrunnenweg 35, 69118 Heidelberg, Germany; <sup>b</sup>Institute of Structural Biology, Helmholtz Zentrum München, Ingolstädter Landstr. 1, 85764 Neuherberg, Germany; <sup>c</sup>Munich Center for Integrated Protein Science, Biomolecular NMR Spectroscopy, Department Chemie, Technische Universität München, Lichtenbergstrasse 4, 85747 Garching, Germany; <sup>d</sup>Laboratoire d'Optique et Biosciences, INSERM U1182, Centre National de la Recherche Scientifique Unité Mixte de Recherche 7645, Ecole Polytechnique, Palaiseau Cedex, France; <sup>e</sup>University of Paris-Sud, Orsay, F-91405; <sup>f</sup>Center for Molecular Biology (ZMBH), Heidelberg University, 69120 Heidelberg, Germany; <sup>g</sup>Interdisciplinary Center for Scientific Computing (IWR), Heidelberg University, Heidelberg, Baden-Württemberg, Germany

<sup>1</sup> Present address: The Scripps Research Institute, Department of Molecular and Experimental Medicine, 10550 North Torrey Pines Road, MEM-131, La Jolla, CA 92037, USA

The Supplementary Information consists of

- 1 PDF document containing Tables S1 and S2, Figures S1-S4, and a list of the proteins studied, and
- Two coordinate files in pqr format: P04818.pqr for human TS, and P0A886.pqr for *E. coli* TS. The coordinate files have hydrogen atoms added, atomic partial charges and radii for the electrostatic potential calculations, and give the coordinate system for defining the region for the PIPSA analysis defined in Figure S1. The human and *E. coli* TS structures were used as templates for homology modeling. The residue numbering scheme in these files corresponds to those of the corresponding PDB files, 1HVY (human) and 2G8O (*E.coli*).

Table S1. Values of the Hodgkin similarity index for the electrostatic potential at the active site of TS of various organisms modeled against the crystal structure of human TS (PDB ID 1HVY). Human and *E. coli* TS were chosen as representatives of eukaryotes and prokaryotes, respectively.

|            | P04818<br>(human) | P0A886<br>( <i>E. coli</i> ) | Q8D2N4<br>(W.g.b) | P59427<br>(B.b.p) | Q8K9C3<br>(B.s.g) | W.g.b_ mut |
|------------|-------------------|------------------------------|-------------------|-------------------|-------------------|------------|
| P04818     | 1                 | 0.849                        | -0.080            | -0.088            | -0.002            | 0.635      |
| P0A886     | 0.849             | 1                            | -0.466            | -0.320            | -0.254            | 0.389      |
| Q8D2N4     | -0.080            | -0.466                       | 1                 | 0.794             | 0.851             | 0.363      |
| P59427     | -0.088            | -0.320                       | 0.794             | 1                 | 0.930             | 0.552      |
| Q8K9C3     | -0.002            | -0.254                       | 0.851             | 0.930             | 1                 | 0.593      |
| W.g.b_ mut | 0.635             | 0.389                        | 0.363             | 0.552             | 0.593             | 1          |

*Wigglesworthia glossinidia brevipalpis* (W.g.b.), *Buchnera aphidicola* subsp. *Baizongia pistaciae* (B.b.p), and *Buchnera aphidicola* subsp. *Schizaphis graminum* (B.s.g). W.g.b\_mut=W.g.b TS quadruple mutant K23G/K82E/K86E/K257G

Table S2. Primer sequences used to mutate the pQE80L\_EcoliWT to code the four single mutants of *E. coli* TS.

| Mutation |       | Primer Sequence                              |
|----------|-------|----------------------------------------------|
| G23K     | Forw. | cagaaaaacgaccgtaccAAAaccggaacgctttccat       |
|          | Rev.  | atggaaagcgttccgggTTTggtacgggctgtttttctg      |
| E82K     | Forw. | aatgtcaccatctgggacAAAatgggcccgatgaaaacg      |
|          | Rev.  | cgttttcatcggcccaTTTgtcccagatgggtgacatt       |
| E86K     | Forw. | tgggacgaatgggcccgatAAAaacggcgacctcgggc       |
|          | Rev.  | gcccgagggtcgccggtTTTatcggcccatcgtccca        |
| G257K    | Forw. | aaggctacgatccgcacccgAAAattaaagcgccgggtggctat |
|          | Rev.  | atagccaccggcgctttaatTTTcggatgcggatcgtagcctt  |

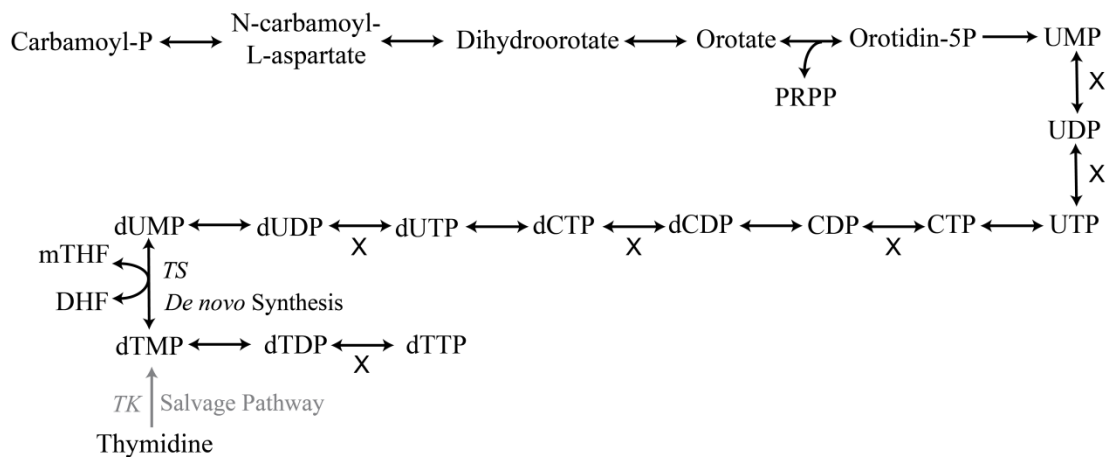

Figure S1. Representative thymidine synthesis pathway and thymidine salvage pathway. Black arrows represent the steps that are catalyzed by proteins whose coding sequences are present in the W.g.b. genome, whereas crosses denote the steps whose enzymes are lacking coding sequences in the *Buchnera* genomes. The grey arrow represents the step missing in both W.g.b. and *Buchnera* due to the lack of a coding sequence for thymidine kinase. The *de novo* synthesis of dTMP catalyzed by thymidylate synthase (TS) and the salvage pathway catalyzed by thymidine kinase (TK) are labeled.

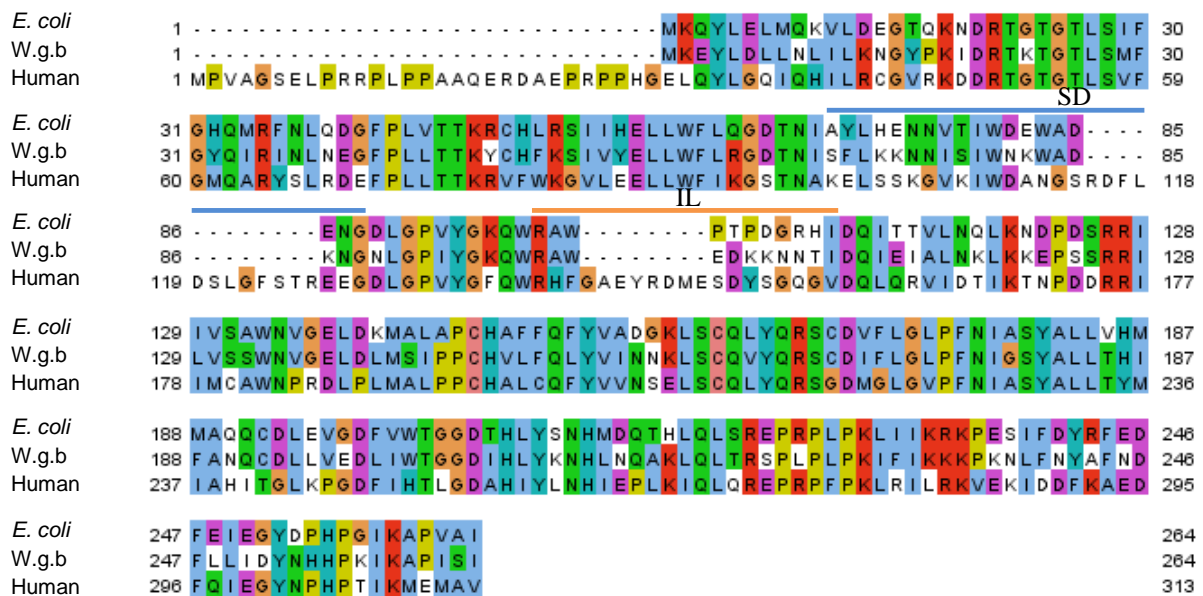

Fig S2. Sequence alignment of *E. coli*, W.g.b. and human TS proteins. The sequences are from UniProt (*E. coli*: P0A886; W.g.b.: Q8D2N4; human: P04818) and numbered accordingly. The background colors of the letters indicate residue type. The Small Domain (SD) and the Interface Loop (IL) are marked by horizontal blue and orange lines, respectively.

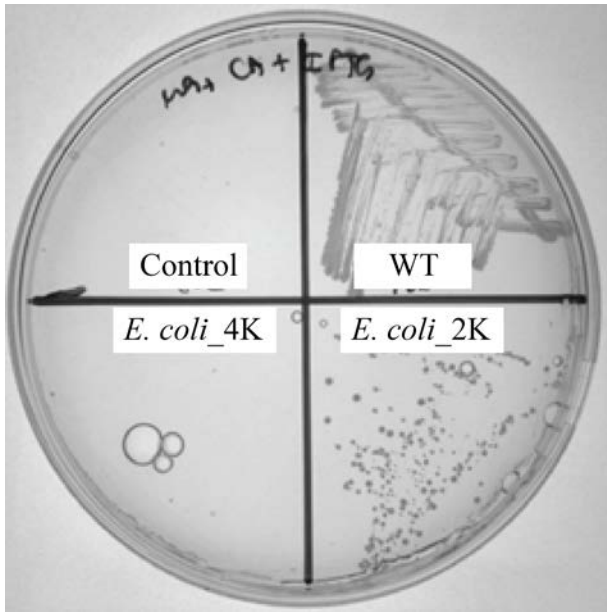

Fig S3. Cell complementation tests for ThyA-negative *E. coli* FE013 (pQE80L) as a control, and for pQE80L expressing the WT TS (*E. coli*\_WT), the *E. coli* double mutant G23K/E86K (*E. coli*\_2K), and the *E. coli* quadruple mutant G23K/E82K/E86K/G257K TS (*E. coli*\_4K). See Table 2.

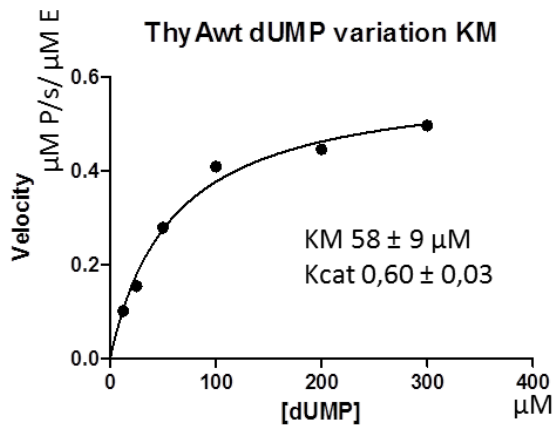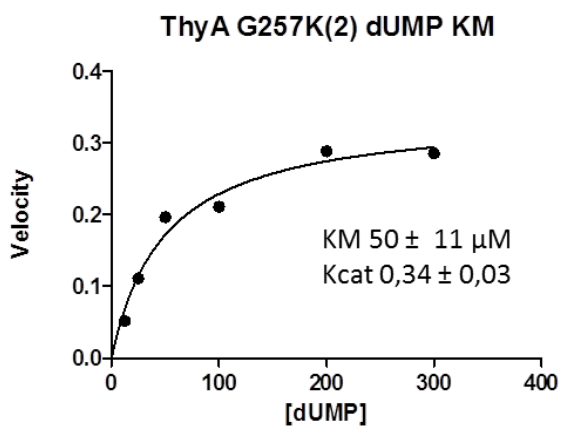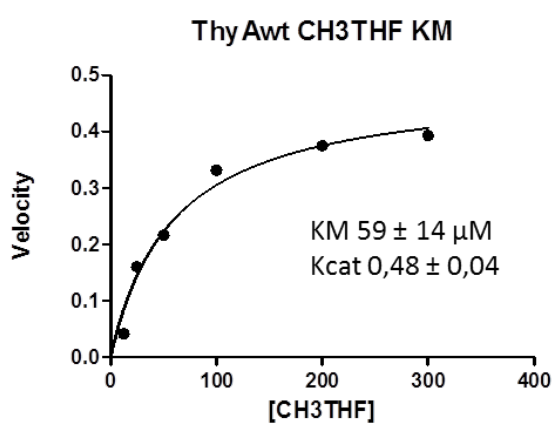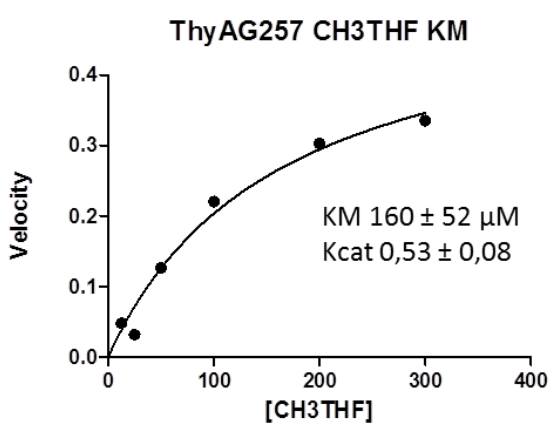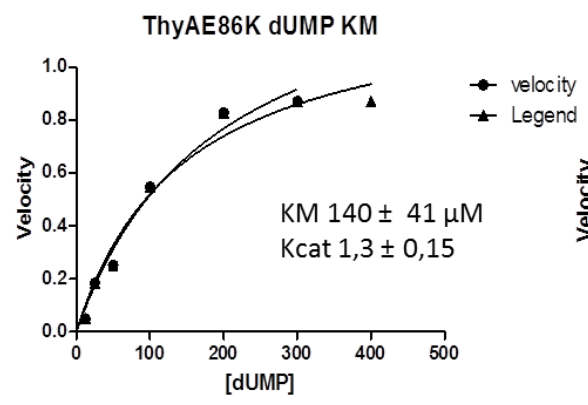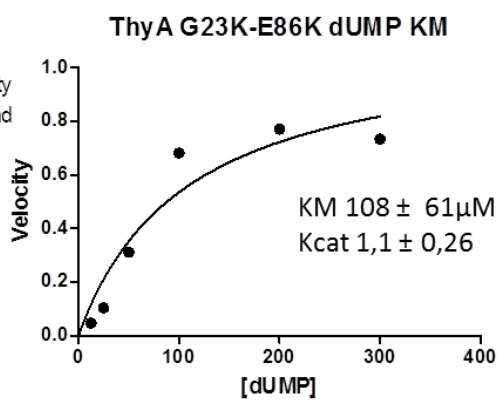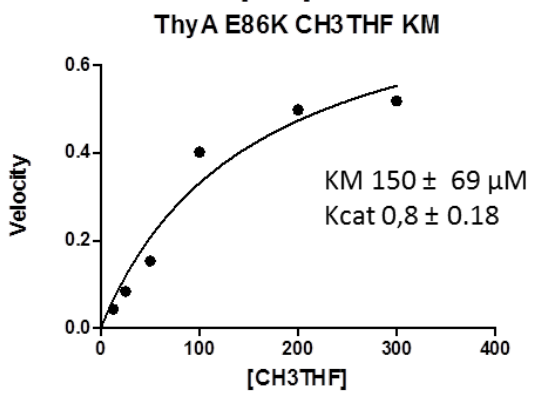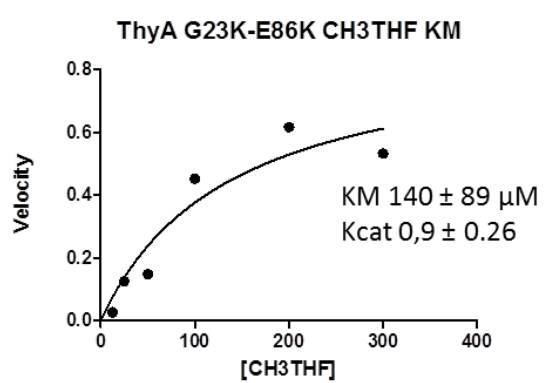

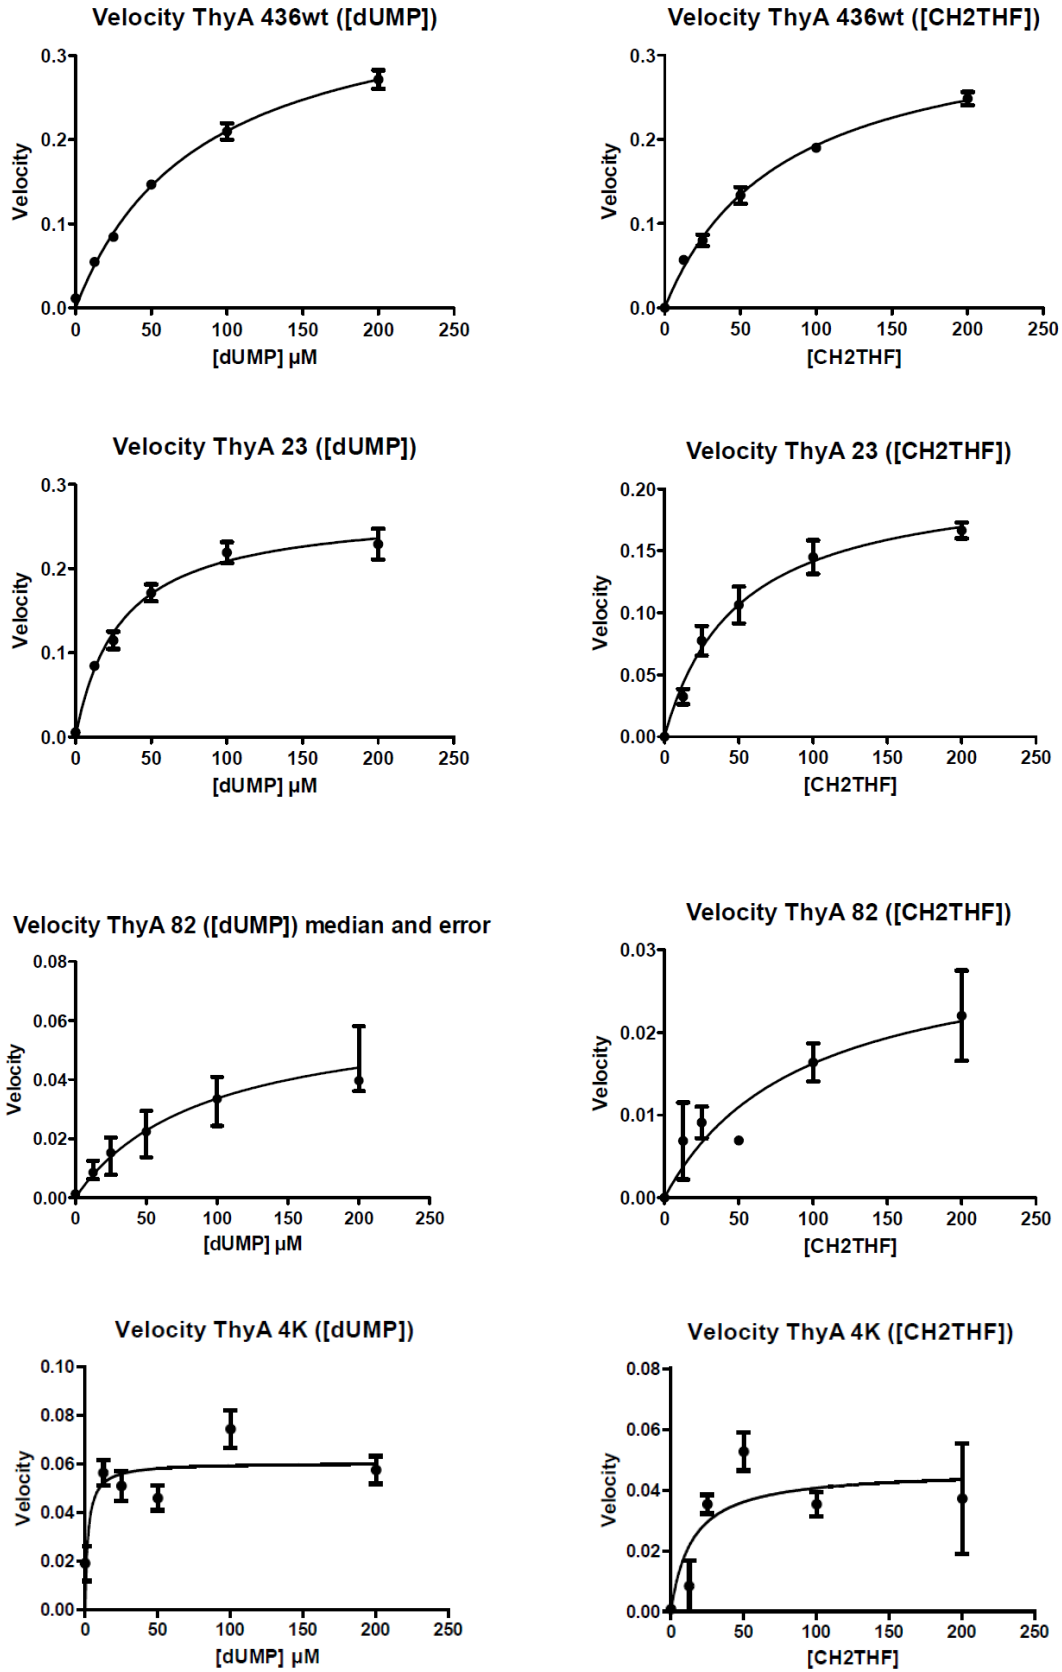

Fig S4. Measured kinetic activities for *E. coli* WT and mutant TS enzymes used to derive  $K_M$  and  $K_{cat}$  values given in Table 3. Error bars on measurements were derived from three independent measurements.

**List of Uniprot IDs for the 110 TS proteins analysed, together with the organism name and taxonomy.**

\*The sequence for TS of tsetse fly was downloaded from the webpage of Prof. Serap Aksoy, Yale School of Public Health, U.S.A.

**Eukaryota**

|        |                                 |               |                |
|--------|---------------------------------|---------------|----------------|
| P04818 | <i>Homo sapiens</i>             | Metazoa       | Chordata       |
| P45352 | <i>Rattus norvegicus</i>        | Metazoa       | Chordata       |
| P07607 | <i>Mus musculus</i>             | Metazoa       | Chordata       |
| O96650 | <i>Ascaris suum</i>             | Metazoa       | Ecdysozoa      |
| O76511 | <i>Drosophila melanogaster</i>  | Metazoa       | Ecdysozoa      |
| *      | Tsetse fly                      | Metazoa       | Ecdysozoa      |
| O62584 | <i>Encephalitozoon cuniculi</i> | Fungi         | Microsporidia  |
| P13100 | <i>Pneumocystis carinii</i>     | Fungi         | Dikarya        |
| Q9P4T7 | <i>Agaricus bisporus</i>        | Fungi         | Dikarya        |
| P45351 | <i>Cryptococcus neoformans</i>  | Fungi         | Dikarya        |
| P06785 | <i>Saccharomyces cerevisiae</i> | Fungi         | Dikarya        |
| O81395 | <i>Zea mays</i>                 | Viridiplantae | Streptophyta   |
| Q2QRX6 | <i>Oryza sativa</i>             | Viridiplantae | Streptophyta   |
| P51820 | <i>Glycine max</i>              | Viridiplantae | Streptophyta   |
| P45350 | <i>Daucus carota</i>            | Viridiplantae | Streptophyta   |
| Q05762 | <i>Arabidopsis thaliana</i>     | Viridiplantae | Streptophyta   |
| Q27828 | <i>Paramecium tetraurelia</i>   | Alveolata     | Ciliophora     |
| O02604 | <i>Plasmodium vivax</i>         | Alveolata     | Apicomplexa    |
| P13922 | <i>Plasmodium falciparum</i>    | Alveolata     | Apicomplexa    |
| Q27713 | <i>Plasmodium berghei</i>       | Alveolata     | Apicomplexa    |
| P20712 | <i>Plasmodium chabaudi</i>      | Alveolata     | Apicomplexa    |
| Q07422 | <i>Toxoplasma gondii</i>        | Alveolata     | Apicomplexa    |
| Q27793 | <i>Trypanosoma cruzi</i>        | Euglenozoa    | Kinetoplastida |
| Q27783 | <i>Trypanosoma brucei</i>       | Euglenozoa    | Kinetoplastida |
| P07382 | <i>Leishmania major</i>         | Euglenozoa    | Kinetoplastida |
| P16126 | <i>Leishmania amazonensis</i>   | Euglenozoa    | Kinetoplastida |
| Q23695 | <i>Crithidia fasciculata</i>    | Euglenozoa    | Kinetoplastida |

**Prokaryota**

|        |                                   |                |                     |
|--------|-----------------------------------|----------------|---------------------|
| Q6MID2 | <i>Bdellovibrio bacteriovorus</i> | Proteobacteria | Deltaproteobacteria |
| Q8PCE7 | <i>Xanthomonas campestris</i>     | Proteobacteria | Gammaproteobacteria |
| Q8PP46 | <i>Xanthomonas axonopodi</i>      | Proteobacteria | Gammaproteobacteria |
| Q5GWB5 | <i>Xanthomonas oryzae</i>         | Proteobacteria | Gammaproteobacteria |
| Q9I6F1 | <i>Pseudomonas aeruginosa</i>     | Proteobacteria | Gammaproteobacteria |
| Q83BG2 | <i>Coxiella burnetii</i>          | Proteobacteria | Gammaproteobacteria |
| Q603S2 | <i>Methylococcus capsulatus</i>   | Proteobacteria | Gammaproteobacteria |
| Q5X119 | <i>Legionella pneumophila</i>     | Proteobacteria | Gammaproteobacteria |
| Q5WSU5 | <i>Legionella pneumophila</i>     | Proteobacteria | Gammaproteobacteria |
| Q5ZRL3 | <i>Legionella pneumophila</i>     | Proteobacteria | Gammaproteobacteria |
| Q8EH94 | <i>Shewanella oneidensis</i>      | Proteobacteria | Gammaproteobacteria |
| Q87BT4 | <i>Xylella fastidiosa</i>         | Proteobacteria | Gammaproteobacteria |

|         |                                               |                                     |
|---------|-----------------------------------------------|-------------------------------------|
| Q9PB13  | <i>Xylella fastidiosa</i>                     | Proteobacteria Gammaproteobacteria  |
| P0A886  | <i>Escherichia coli</i>                       | Proteobacteria Gammaproteobacteria  |
| Q8ZHV1  | <i>Yersinia pestis</i>                        | Proteobacteria Gammaproteobacteria  |
| Q667F9  | <i>Yersinia pseudotuberculosis</i>            | Proteobacteria Gammaproteobacteria  |
| Q6REU8  | <i>Xenorhabdus nematophilus</i>               | Proteobacteria Gammaproteobacteria  |
| Q7N8U4  | <i>Photorhabdus luminescens</i>               | Proteobacteria Gammaproteobacteria  |
| P48464  | <i>Shigella flexneri</i>                      | Proteobacteria Gammaproteobacteria  |
| Q5PEN6  | <i>Salmonella paratyphi-a</i>                 | Proteobacteria Gammaproteobacteria  |
| Q8ZMA9  | <i>Salmonella typhimurium</i>                 | Proteobacteria Gammaproteobacteria  |
| Q8Z412  | <i>Salmonella typhi</i>                       | Proteobacteria Gammaproteobacteria  |
| Q6D8I6  | <i>Erwinia carotovora</i>                     | Proteobacteria Gammaproteobacteria; |
| P57515  | <i>Buchnera aphidicola</i>                    | Proteobacteria Gammaproteobacteria  |
| P59427  | <i>Buchnera aphidicola</i>                    | Proteobacteria Gammaproteobacteria  |
| Q8K9C3  | <i>Buchnera aphidicola</i>                    | Proteobacteria Gammaproteobacteria  |
| Q8D2N4  | <i>Wigglesworthia glossinidia brevipalpis</i> | Proteobacteria Gammaproteobacteria  |
| P44420  | <i>Haemophilus influenzae</i>                 | Proteobacteria Gammaproteobacteria  |
| Q5R064  | <i>Idiomarina loihiensis</i>                  | Proteobacteria Gammaproteobacteria  |
| Q6FER7  | <i>Acinetobacter sp</i>                       | Proteobacteria Gammaproteobacteria  |
| Q2NRH3  | <i>Sodalis glossinidius</i>                   | Proteobacteria Gammaproteobacteria  |
|         |                                               |                                     |
| O33380, | <i>Neisseria gonorrhoeae</i>                  | Proteobacteria Betaproteobacteria   |
| Q9JT57  | <i>Neisseria meningitidis</i>                 | Proteobacteria Betaproteobacteria   |
| Q82WU3  | <i>Nitrosomonas europaea</i>                  | Proteobacteria Betaproteobacteria   |
| Q9RAM7  | <i>Methylobacillus flagellatus</i>            | Proteobacteria Betaproteobacteria   |
| Q5P233  | <i>Azoarcus sp.</i>                           | Proteobacteria Betaproteobacteria   |
| Q8Y0U6  | <i>Ralstonia solanacearum</i>                 | Proteobacteria Betaproteobacteria   |
| Q7NZ95  | <i>Chromobacterium violaceum</i>              | Proteobacteria Betaproteobacteria   |
|         |                                               |                                     |
| P67042  | <i>Brucella melitensis</i>                    | Proteobacteria Alphaproteobacteria  |
| P67043  | <i>Brucella suis</i>                          | Proteobacteria Alphaproteobacteria  |
| Q89G35  | <i>Bradyrhizobium japonicum</i>               | Proteobacteria Alphaproteobacteria  |
| Q98KH9  | <i>Rhizobium loti</i>                         | Proteobacteria Alphaproteobacteria  |
| Q6N447  | <i>Rhodopseudomonas palustris</i>             | Proteobacteria Alphaproteobacteria  |
| Q92NQ5  | <i>Rhizobium meliloti</i>                     | Proteobacteria Alphaproteobacteria  |
| Q8UDS3  | <i>Agrobacterium tumefaciens</i>              | Proteobacteria Alphaproteobacteria  |
| Q9A6H0  | <i>Caulobacter crescentus</i>                 | Proteobacteria Alphaproteobacteria  |
| Q6FZ91  | <i>Bartonella quintana</i>                    | Proteobacteria Alphaproteobacteria  |
| Q6G2S8  | <i>Bartonella henselae</i>                    | Proteobacteria Alphaproteobacteria  |
|         |                                               |                                     |
| Q5YPL7  | <i>Nocardia farcinica</i>                     | Actinobacteria Actinobacteridae     |
| Q6A761  | <i>Propionibacterium acnes</i>                | Actinobacteria Actinobacteridae     |
| Q6AFI0  | <i>Leifsonia xyli subsp. xyli</i>             | Actinobacteria Actinobacteridae     |
| Q8G3T9  | <i>Bifidobacterium longum</i>                 | Actinobacteria Actinobacteridae     |
| Q73VZ2  | <i>Mycobacterium paratuberculosis</i>         | Actinobacteria Actinobacteridae     |
| Q9CBW0  | <i>Mycobacterium leprae</i>                   | Actinobacteria Actinobacteridae     |
| P67044  | <i>Mycobacterium tuberculosis</i>             | Actinobacteria Actinobacteridae     |
| P67045  | <i>Mycobacterium bovis</i>                    | Actinobacteria Actinobacteridae     |
| Q6NIF2  | <i>Corynebacterium diphtheriae</i>            | Actinobacteria Actinobacteridae     |
| Q8FR47  | <i>Corynebacterium efficiens</i>              | Actinobacteria Actinobacteridae     |
| Q8NS38  | <i>Corynebacterium glutamicum</i>             | Actinobacteria Actinobacteridae     |



|                |                                                         |                |                  |
|----------------|---------------------------------------------------------|----------------|------------------|
| Q7MTB5         | <i>Porphyromonas gingivalis</i>                         | Bacteroidetes  | Bacteroidetes    |
| Q8A639         | <i>Bacteroides thetaiotaomicron</i>                     | Bacteroidetes  | Bacteroidetes    |
| Q64PV5         | <i>Bacteroides fragilis</i>                             | Bacteroidetes  | Bacteroidetes    |
| D0JBG7         | <i>Blattabacterium sp. subsp. Blattella germanica</i>   | Bacteroidetes  | Flavobacteria    |
| D0J8U9         | <i>Blattabacterium sp. subsp. Periplaneta americana</i> | Bacteroidetes  | Flavobacteria    |
| Q7UID0         | <i>Rhodopirellula baltica</i>                           | Planctomycetes | Planctomycetacia |
| Q5WDS1         | <i>Bacillus clausii</i>                                 | Firmicutes     | Bacillales       |
| Q59212         | <i>Bacillus licheniformis</i>                           | Firmicutes     | Bacillales       |
| Q65J44         | <i>Bacillus licheniformis</i>                           | Firmicutes     | Bacillales       |
| Q9ANR7         | <i>Bacillus mojavensis</i>                              | Firmicutes     | Bacillales       |
| P42326         | <i>Bacillus subtilis</i>                                | Firmicutes     | Bacillales       |
| Q5D189         | <i>Bacillus subtilis</i>                                | Firmicutes     | Bacillales       |
| Q9K7B5         | <i>Bacillus halodurans</i>                              | Firmicutes     | Bacillales       |
| P54081         | <i>Bacillus amyloliquefaciens</i>                       | Firmicutes     | Bacillales       |
| Q67JQ1         | <i>Symbiobacterium thermophilum</i>                     | Firmicutes     | Lactobacillales  |
| Q5KZ25         | <i>Geobacillus kaustophilus</i>                         | Firmicutes     | Bacillales       |
| Q97EV3         | <i>Clostridium acetobutylicum</i>                       | Firmicutes     | Clostridia       |
| <b>Viruses</b> |                                                         |                |                  |
| P07606         | <i>Bacillus phage phi3T</i>                             | dsDNA viruses  | Caudovirales     |
| P00471         | <i>Enterobacteria phage T4</i>                          | dsDNA viruses  | Caudovirales     |
| P90463         | <i>Human herpesvirus 8</i>                              | dsDNA viruses  | Herpesvirales    |
| P06854         | <i>Saimiriine herpesvirus 2</i>                         | dsDNA viruses  | Herpesvirales    |
| P12462         | <i>Herpesvirus ateles</i>                               | dsDNA viruses  | Herpesvirales    |
| Q89940         | <i>Equine herpesvirus 2</i>                             | dsDNA viruses  | Herpesvirales    |
| P09249         | <i>Varicella-zoster virus</i>                           | dsDNA viruses  | Herpesvirales    |
